# Supplementary material for: Interpenetrating Polymer Networks of Poly(2-hydroxyethyl methacrylate) and Poly(N, N-dimethylacrylamide) as Potential Systems for Dermal Delivery of Dexamethasone Phosphate
Source: MDPI journal article supplement (doi:10.3390/pharmaceutics15092328), 2023-09-15
Supplement: s1 [file s1]

## Supplementary information

**Table S1.** Chemical formulas and role of the reagents used within the study

| Name of the reagent                              | Chemical formula                                                                     | Role                                                                         |
|--------------------------------------------------|--------------------------------------------------------------------------------------|------------------------------------------------------------------------------|
| 2-Hydroxyethyl methacrylate (HEMA)               | 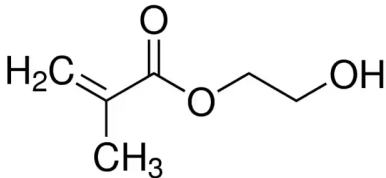   | Monomer 1<br>(used for preparation of the first single network)              |
| N,N-Dimethylacrylamide (DMAM)                    |     | Monomer 2<br>(used for preparation of the second single network in the IPNs) |
| Poly(ethylene glycol) diacrylate (PEGDA, Mn=575) |   | Crosslinking agent for both PHEMA and PDMAM networks                         |
| 1-Hydroxycyclohexyl phenyl ketone (HCHPK)        |  | UV-photoinitiator                                                            |
| Dexamethasone Sodium Phosphate (DXP)             |  | Drug for treatment of arthritis                                              |

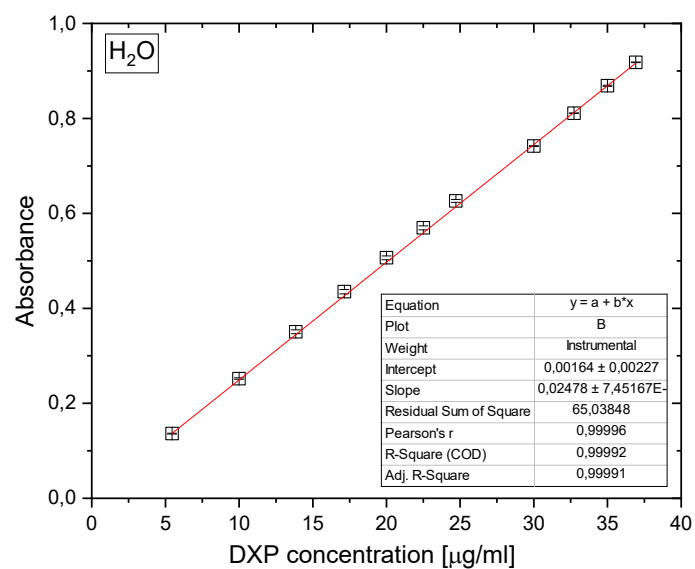

**Figure S1.** Calibration curve of DXP in water

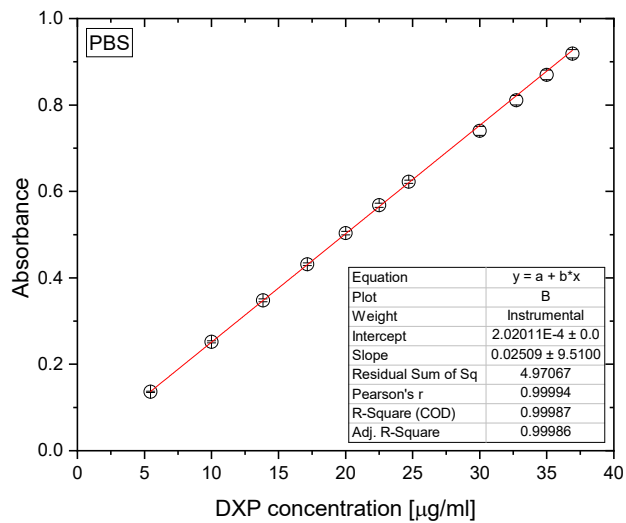

**Figure S2.** Calibration curve of DXP in PBS

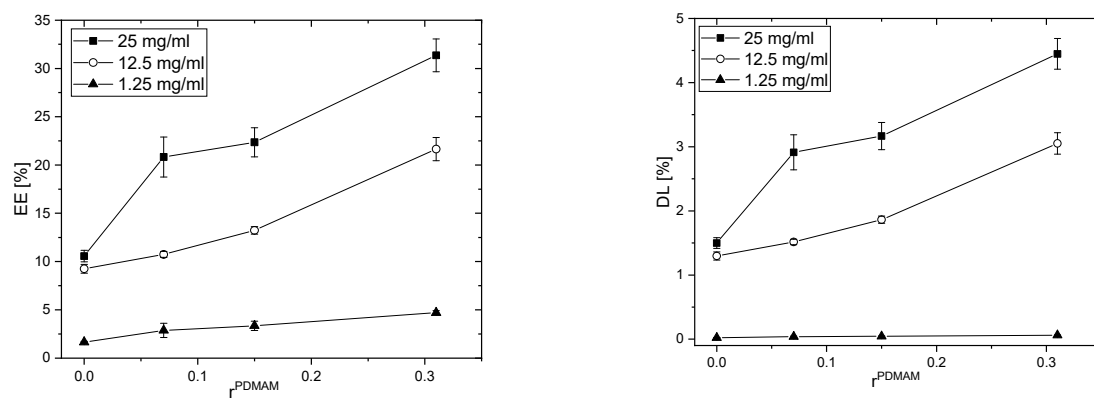

**Figure S3.** Dependence of DXP EE and DL in PHEMA SN and PHEMA/PDMAM IPNs as a function of the PDMAM content into the IPNs, defined by  $r^{\text{PDMAM}}$ .

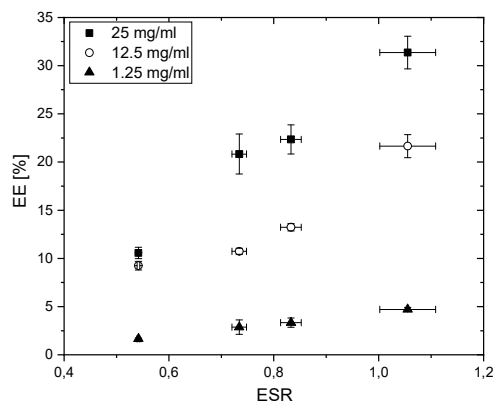

**A**

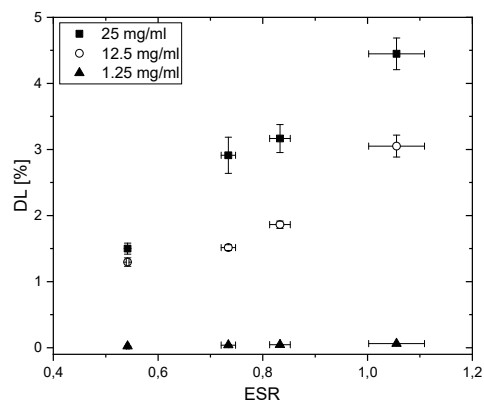

**B**

**Figure S4.** Correlation between (A) EE and ESR of the respective PHEMA/PDMAM IPNs and (B) DL from and ESR of the respective PHEMA/PDMAM IPNs. The PHEMA SN has the lowest ESR and it is also presented.

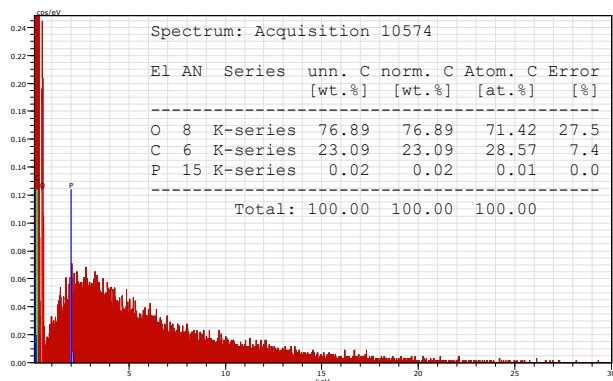

**A**

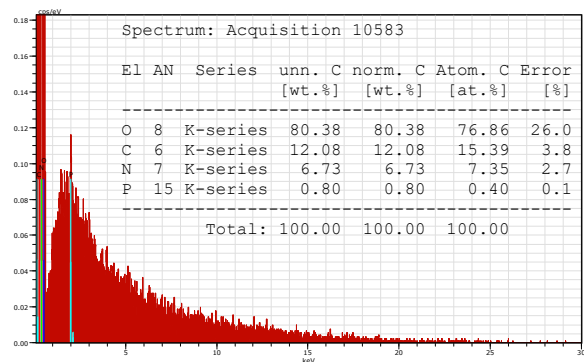

**B**

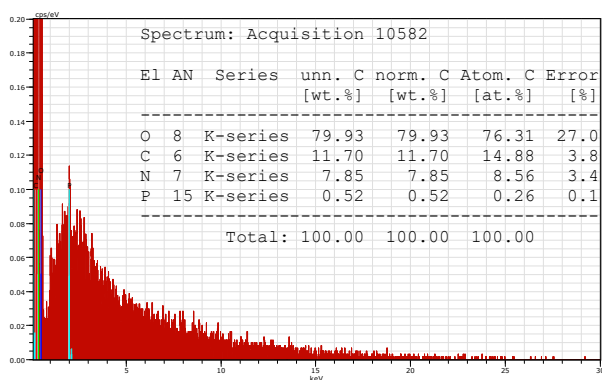

**C**

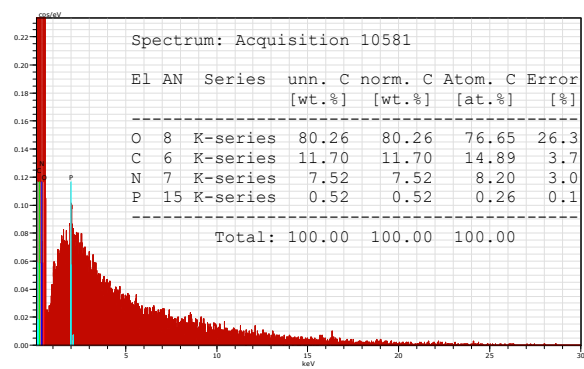

**D**

**Figure S5.** EDX spectra of DXP loaded samples P1 (A), P125 (B), P250 (C) and P500 (D)

## ATR-FTIR of PHEMA SN, PDMAM SNs as well as of their IPN

ATR-FTIR spectra of non-loaded and DXP-loaded PHEMA/PDMAM IPNs as well as of PHEMA and PDMAM SNs were obtained in order to detail study the interaction between both constituents of the IPNs as well as the drug-polymers interactions.

In the spectrum of PHEMA SN (P1, Figure S6) the characteristic band at  $1717\text{ cm}^{-1}$  are assigned to  $\text{-C=O}$  stretching. In addition, the bands at  $1153$ ,  $1456$ , and  $2943\text{ cm}^{-1}$  are assigned to  $\text{-C-O}$  stretching,  $\text{-C-H}$  bending, and  $\text{-CH}_2\text{-}$  group, respectively. The band at  $1022\text{ cm}^{-1}$  in the same spectrum originates from the  $\text{-C-O}$  bending.<sup>1</sup>

In the spectrum of PDMAM SN (P1, Figure S6), the band at  $1653\text{ cm}^{-1}$  is assigned to the  $\text{C=O}$  group stretching vibration. The band at  $1616\text{ cm}^{-1}$  is attributed to the  $\text{C=O}$  stretching vibrations (amide I). The band at  $1498\text{ cm}^{-1}$  originates from the combination of the  $\text{-N-H}$  bending and the  $\text{-C-N}$  stretching vibrations of the amide II group, while the bands at  $2926\text{ cm}^{-1}$  and  $1251\text{ cm}^{-1}$  correspond to the  $\text{-C-H}$  stretching and  $\text{-C-H}$  twisting vibrations, respectively.<sup>2</sup>

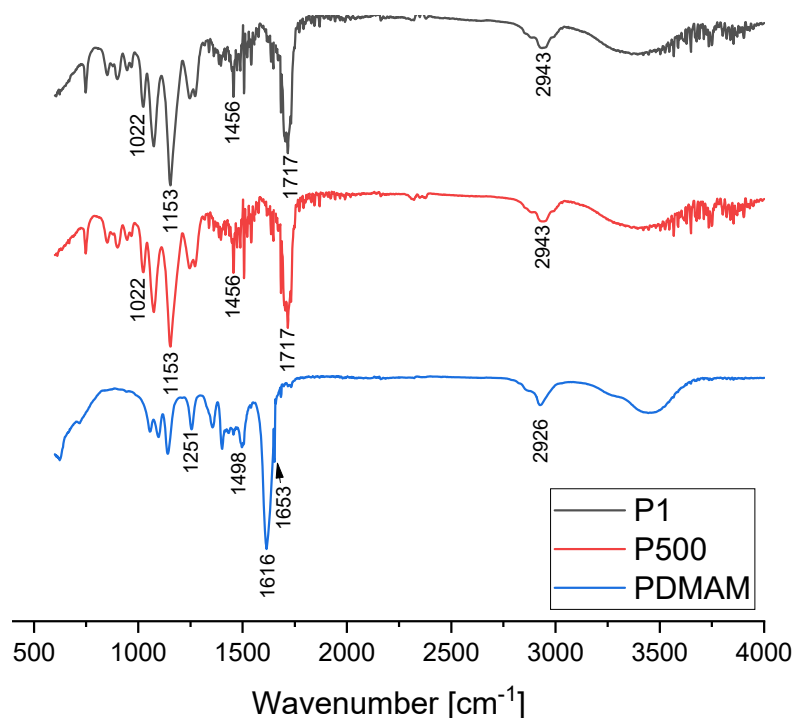

**Figure S6.** ATR-FTIR spectra of PHEMA SN (P1), PDMAM SN and their IPN with composition IPN P500 ( $r^{\text{PDMAM}}=0.31$ ).

<sup>1</sup> Buxadera-Palomero, J.; Fricke, K.; Reuter, S.; Gil, F.J.; Rodriguez, D.; Canal, C. One-Step Liquid Phase Polymerization of HEMA by Atmospheric-Pressure Plasma Discharges for Ti Dental Implants. *Appl. Sci.* **2021**, *11*, 662. <https://doi.org/10.3390/app11020662>

<sup>2</sup> Lee, J.H., Han, W.J., Jang, H.S. *et al.* Highly Tough, Biocompatible, and Magneto-Responsive  $\text{Fe}_3\text{O}_4$ /Laponite/PDMAAm Nanocomposite Hydrogels. *Sci Rep* **9**, 15024 (2019). <https://doi.org/10.1038/s41598-019-51555-5>

The bands of PHEMA and PDMAM strongly overlap and in the spectrum of the IPN sample P500 ( $r^{\text{PDMAM}}=0.31$ ) and as there is no change in the position or intensity of the bands in this spectrum, it is not possible to draw any definite conclusion about any PHEMA - PDMAM interaction.

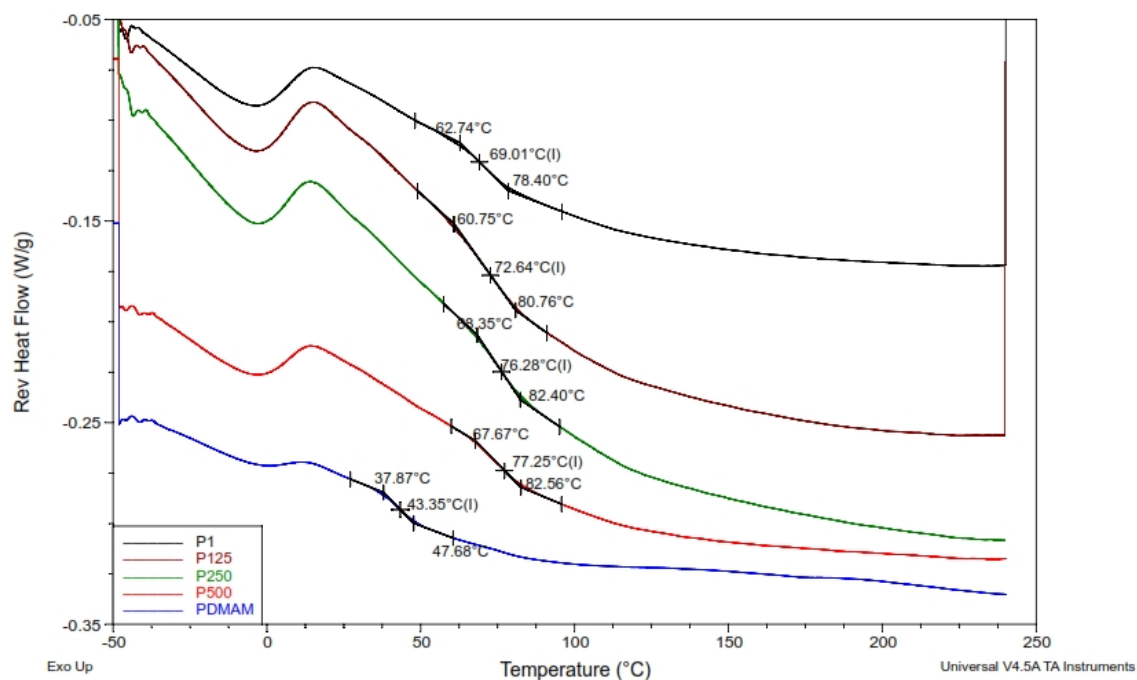

**Figure S7.** Reversing heat flow TMDSC thermograms of dry PHEMA and PDMAM SNs as well as for their IPNs

**Table S2.** Tg of non-loaded and DXP loaded PHEMA and PDMAM SNs as well as of their IPNs.

| Sample | Tg [°C]           |                   |
|--------|-------------------|-------------------|
|        | <i>Non-loaded</i> | <i>DXP loaded</i> |
| P1     | 69                | 80                |
| P125   | 73                | 79                |
| P250   | 76                | 77                |
| P500   | 77                | 70                |
| PDMAM  | 43                | n.a.              |



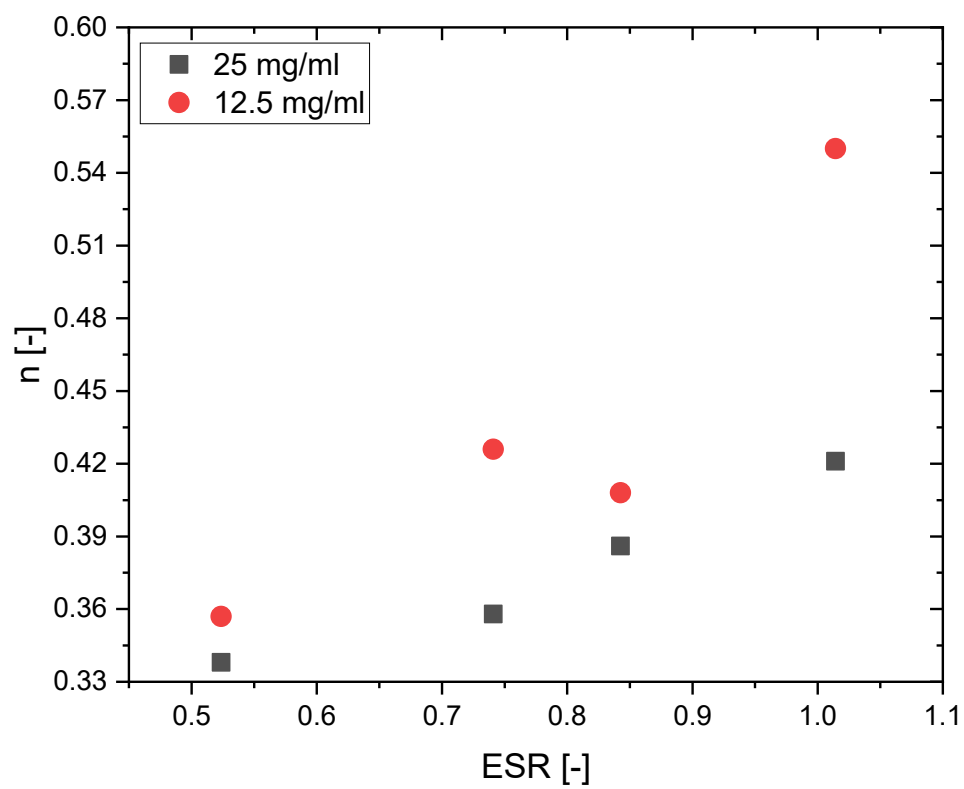

**Figure S8.** Correlation between diffusional exponents ( $n$ ) of DXP release from PHEMA/PDMAM IPNs and their respective ESR.
